# Supplementary material for: Reactivity of a mixed methyl–aminobenzyl guanidinate lutetium complex towards iPrNCNiPr, CS2 and Ph2PH
Source: Royal Society of Chemistry journal article supplement (doi:10.1039/d2dt02008d), 2022-01-01
Supplement: d2dt02008d1.pdf [file d2dt02008d1.pdf]

## Supporting Information

### Reactivity of Mixed Methyl-Aminobenzyl Guanidinate Lutetium Complex towards $i\text{PrN}=\text{C}=\text{N}i\text{Pr}$ , $\text{CS}_2$ and $\text{Ph}_2\text{PH}$

*Wen Jiang,<sup>†</sup> Lijun Zhang<sup>\*,‡</sup> and Lixin Zhang<sup>\*,†</sup>*

<sup>†</sup>. Department of Chemistry, Shanghai Key Laboratory of Molecular Catalysis and Innovative Materials, Jiangwan Campus, Fudan University Shanghai 200438, China.

<sup>‡</sup>. Key Laboratory of Functional Molecular Solids, Ministry of Education, Anhui Laboratory of Molecule-Based Materials, College of Chemistry and Materials Science, Anhui Normal University, Wuhu, Anhui 241000, People's Republic of China.

\* E-mail: [zljun@mail.ahnu.edu.cn](mailto:zljun@mail.ahnu.edu.cn) and [lixinzh@fudan.edu.cn](mailto:lixinzh@fudan.edu.cn)

### Tables of Contents

|                                                                                                         |    |
|---------------------------------------------------------------------------------------------------------|----|
| $^1\text{H}$ , $^{13}\text{C}\{^1\text{H}\}$ and $^{31}\text{P}\{^1\text{H}\}$ NMR spectra of complexes | 2  |
| Molecular structures of all complexes                                                                   | 13 |
| Crytallographic data and structure refinement details                                                   | 22 |

## 1. NMR spectra of complexes 1-6 and 8-10

The solid samples were dissolved in  $C_6D_6$ , and then transferred into a J-Young NMR tube in the glove-box. The  $^1H$  NMR,  $^{13}C\{^1H\}$  NMR and  $^{31}P\{^1H\}$  NMR spectra were recorded on a JEOL ECA-400 NMR spectrometer (FT, 400 MHz for  $^1H$ ; 100 MHz for  $^{13}C$ ; 161.88 MHz for  $^{31}P$ ) in  $C_6D_6$  at room temperature (except for Fig. S8).

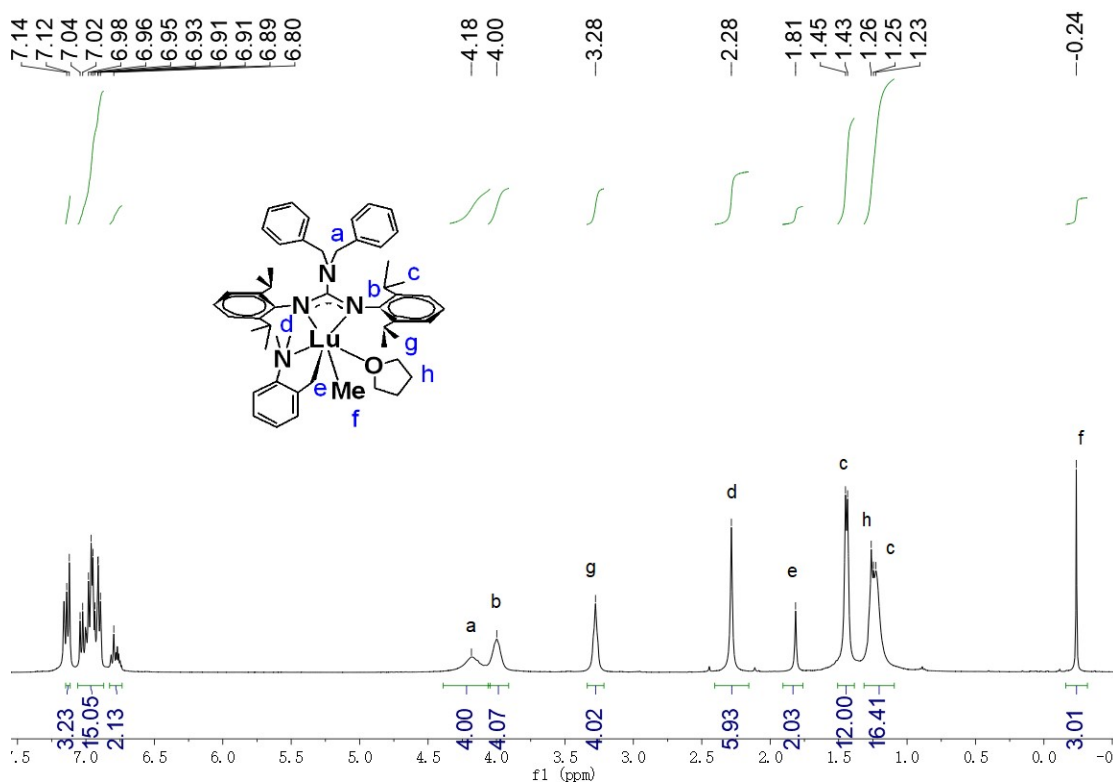

Fig. S1  $^1H$  NMR spectrum of **1** obtained in  $C_6D_6$  at room temperature.

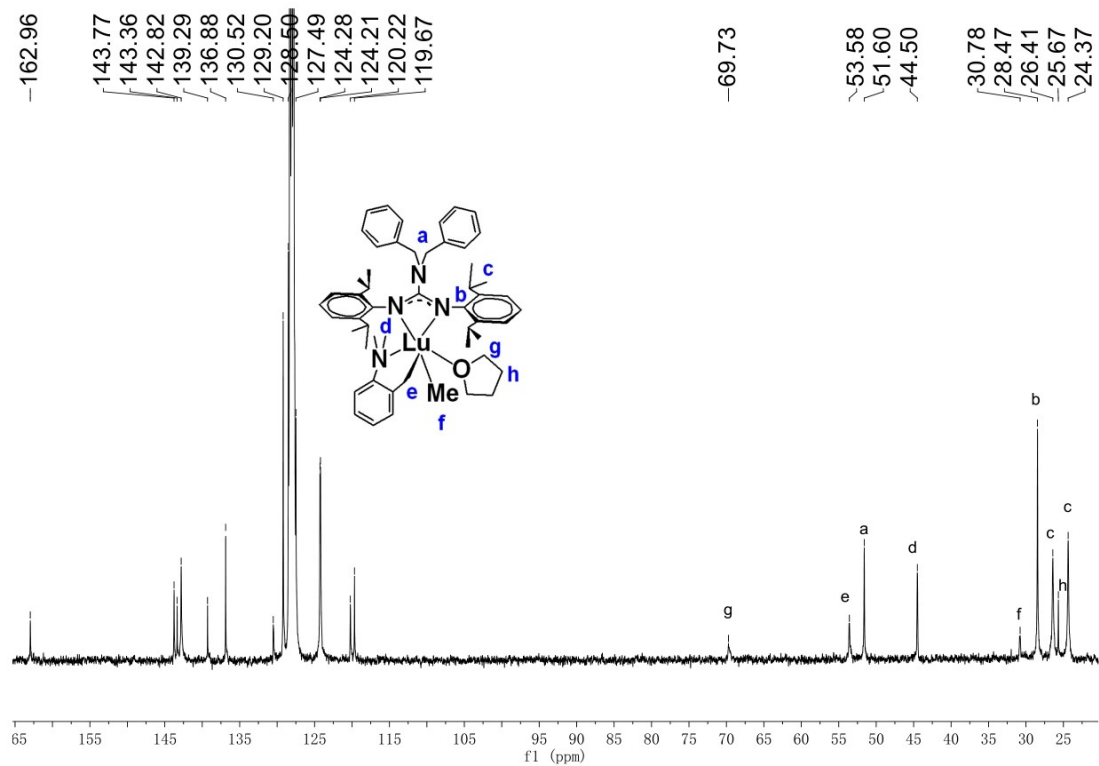

Fig. S2  $^{13}\text{C}$  NMR spectrum of **1** obtained in  $\text{C}_6\text{D}_6$  at room temperature.

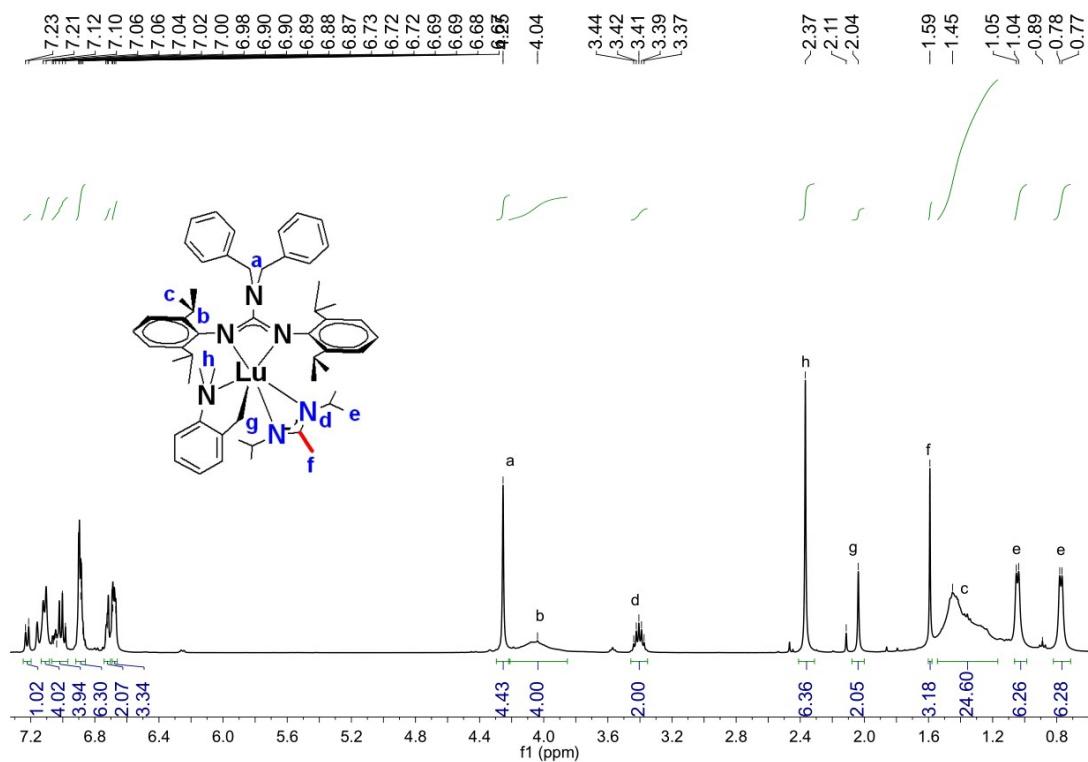

Fig. S3  $^1\text{H}$  NMR spectrum of **2** obtained in  $\text{C}_6\text{D}_6$  at room temperature.

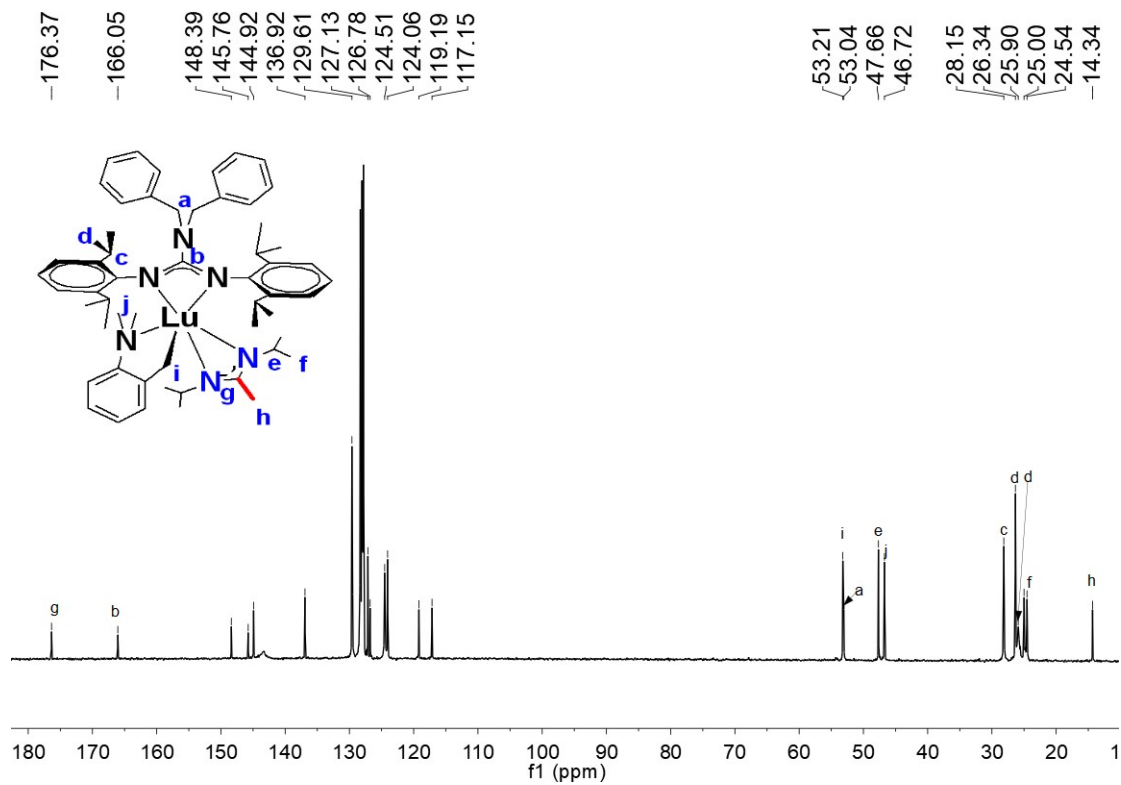

Fig. S4  $^{13}\text{C}$  NMR spectrum of **2** obtained in  $\text{C}_6\text{D}_6$  at room temperature.

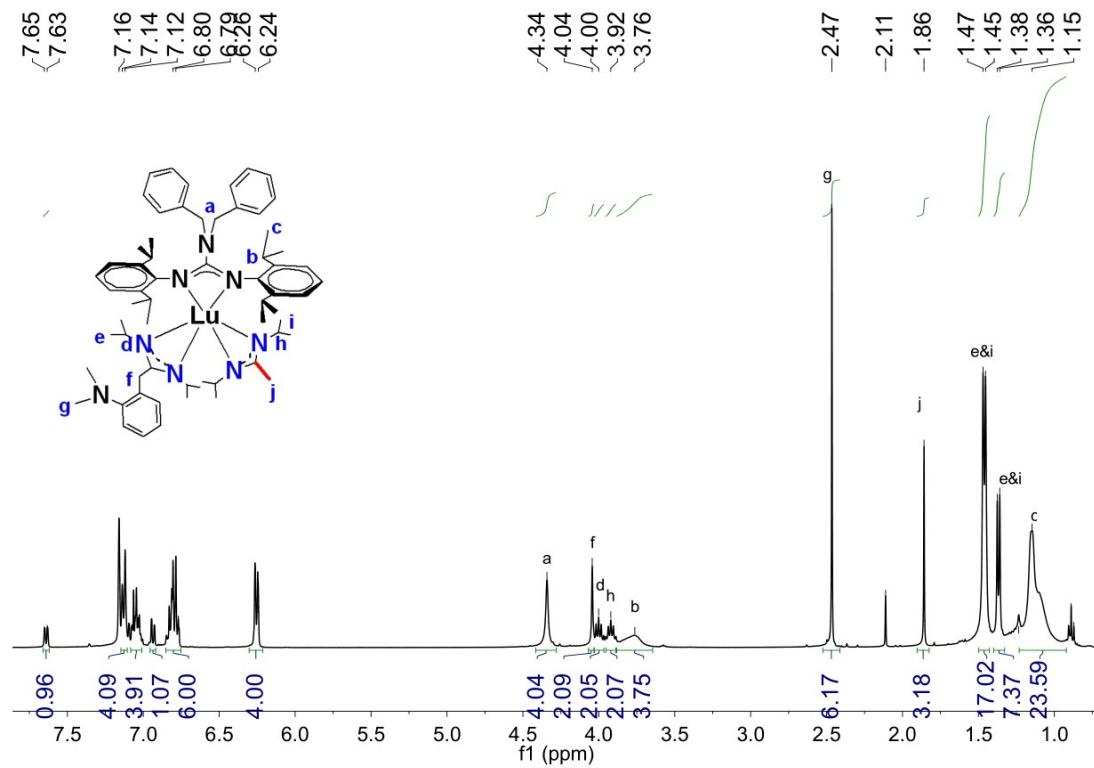

Fig. S5  $^1\text{H}$  NMR spectrum of **3** obtained in  $\text{C}_6\text{D}_6$  at room temperature.

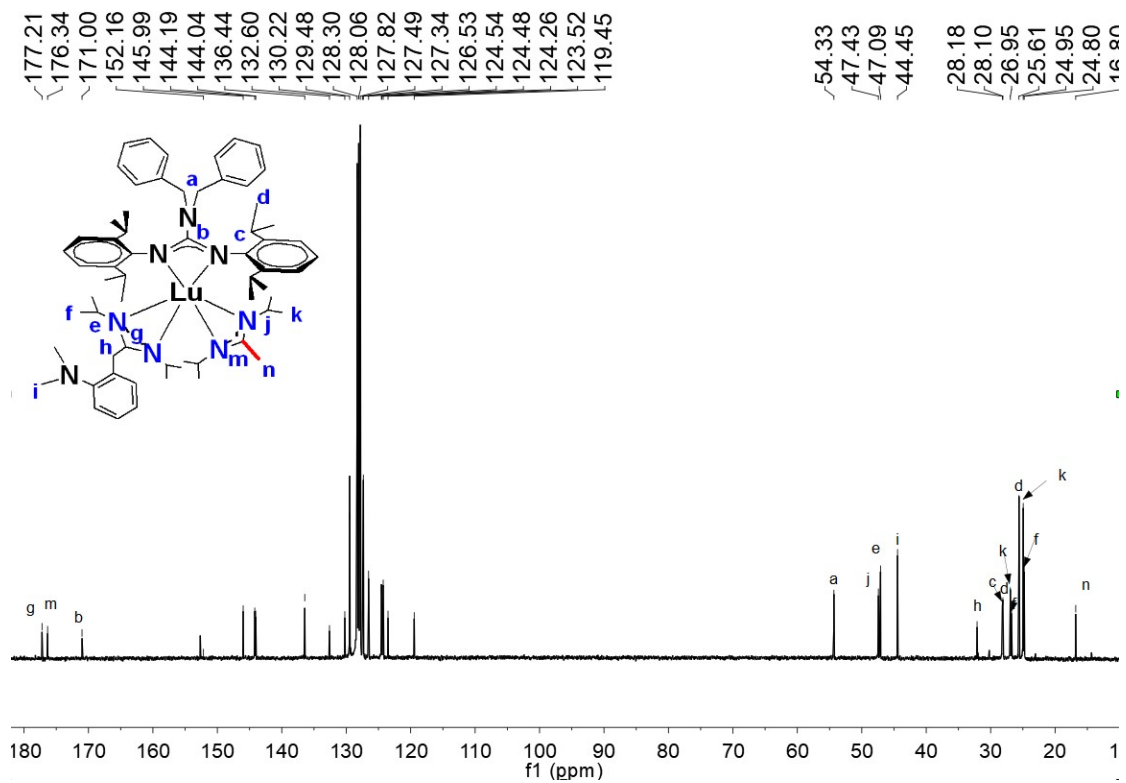

Fig. S6  $^{13}\text{C}$  NMR spectrum of **3** obtained in  $\text{C}_6\text{D}_6$  at room temperature.

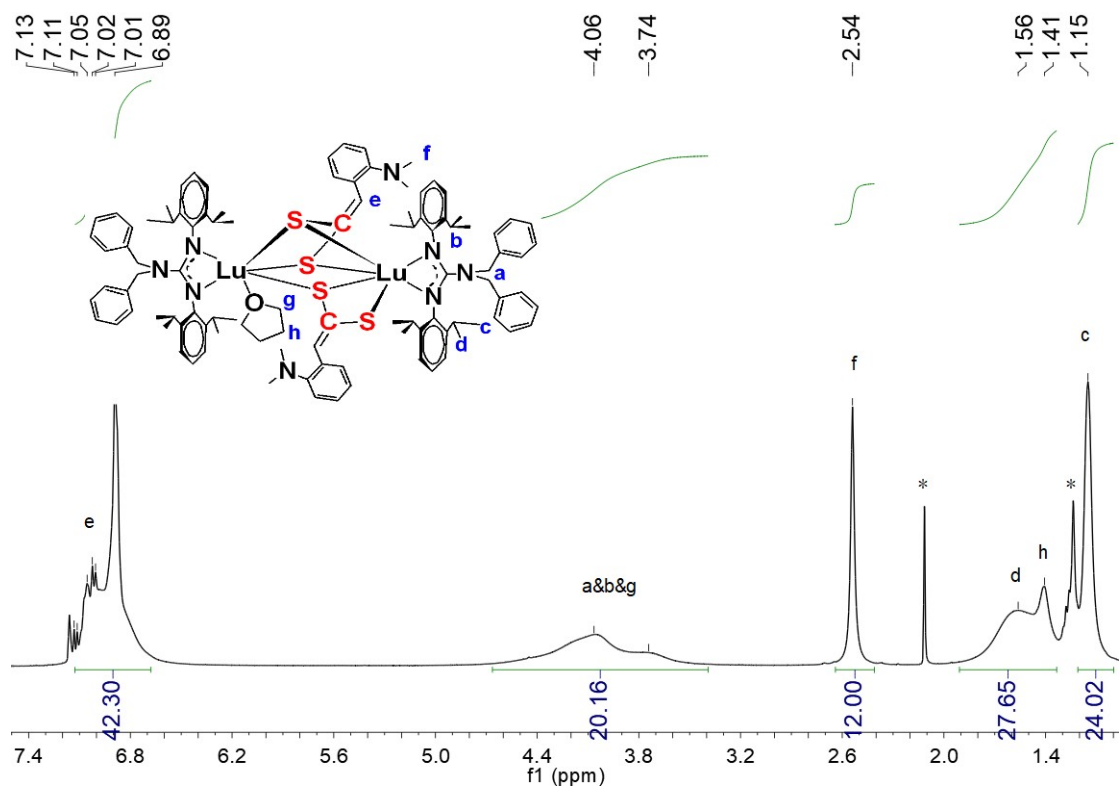

Fig. S7  $^1\text{H}$  NMR spectrum of **4** obtained in  $\text{C}_6\text{D}_6$  at room temperature.

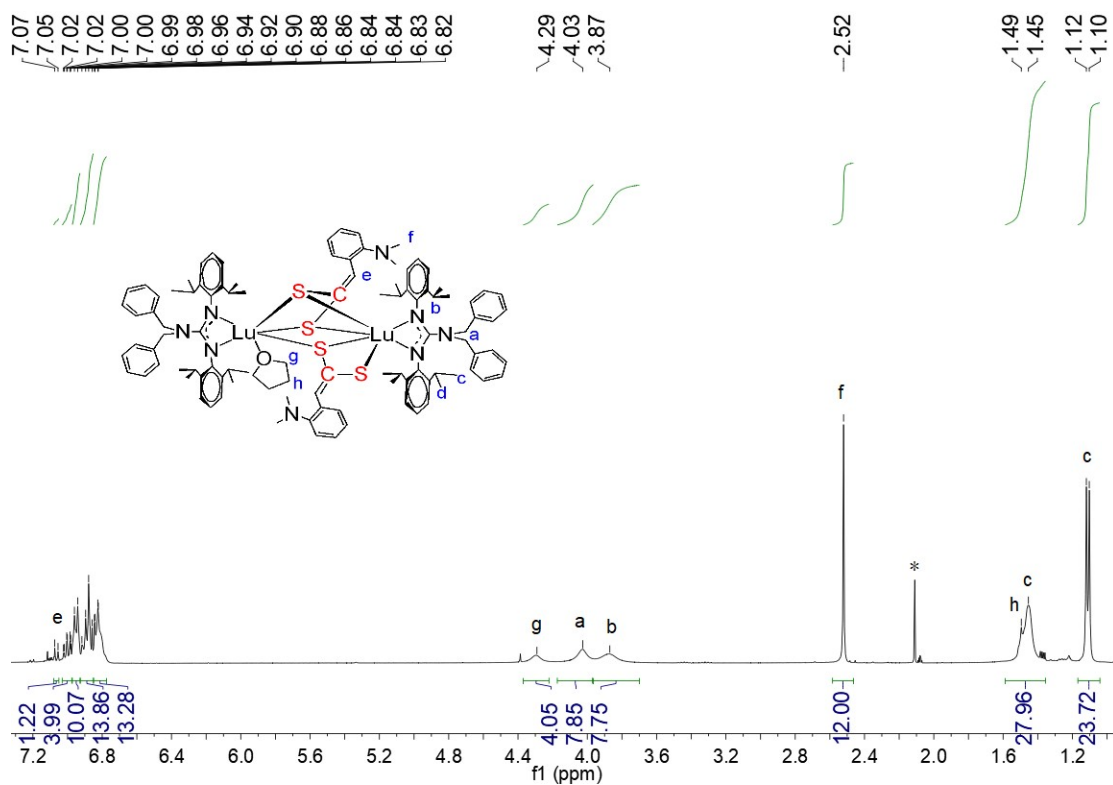

Fig. S8  $^1\text{H}$  NMR spectrum of **4** obtained in  $\text{tol-d}_8$  at  $50\text{ }^\circ\text{C}$ .

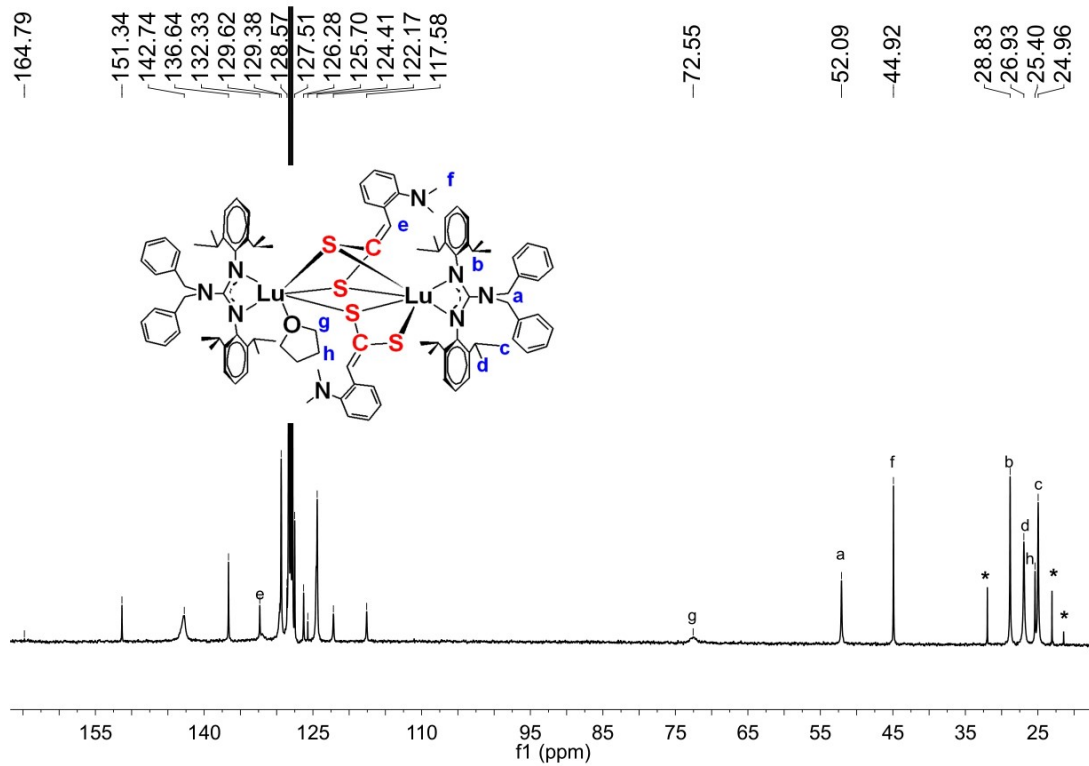

Fig. S9  $^{13}\text{C}$  NMR spectrum of **4** obtained in  $\text{C}_6\text{D}_6$  at room temperature.

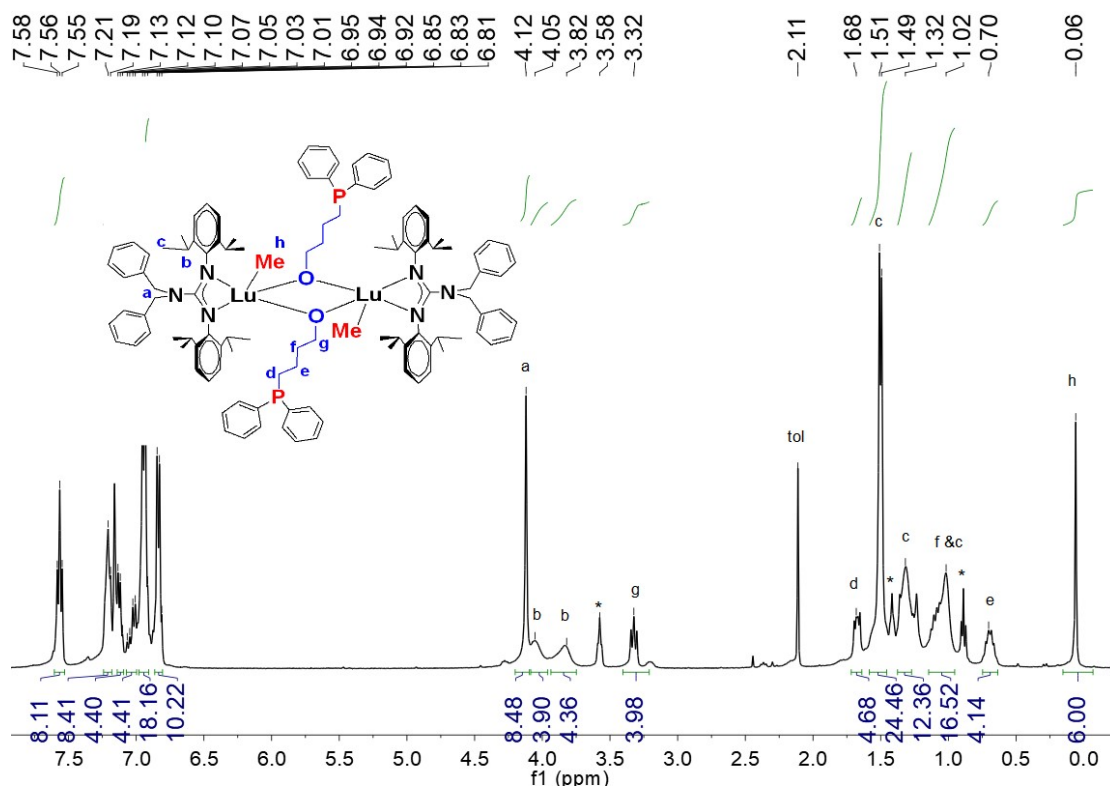

Fig. S10 <sup>1</sup>H NMR spectrum of **5** obtained in C<sub>6</sub>D<sub>6</sub> at room temperature.

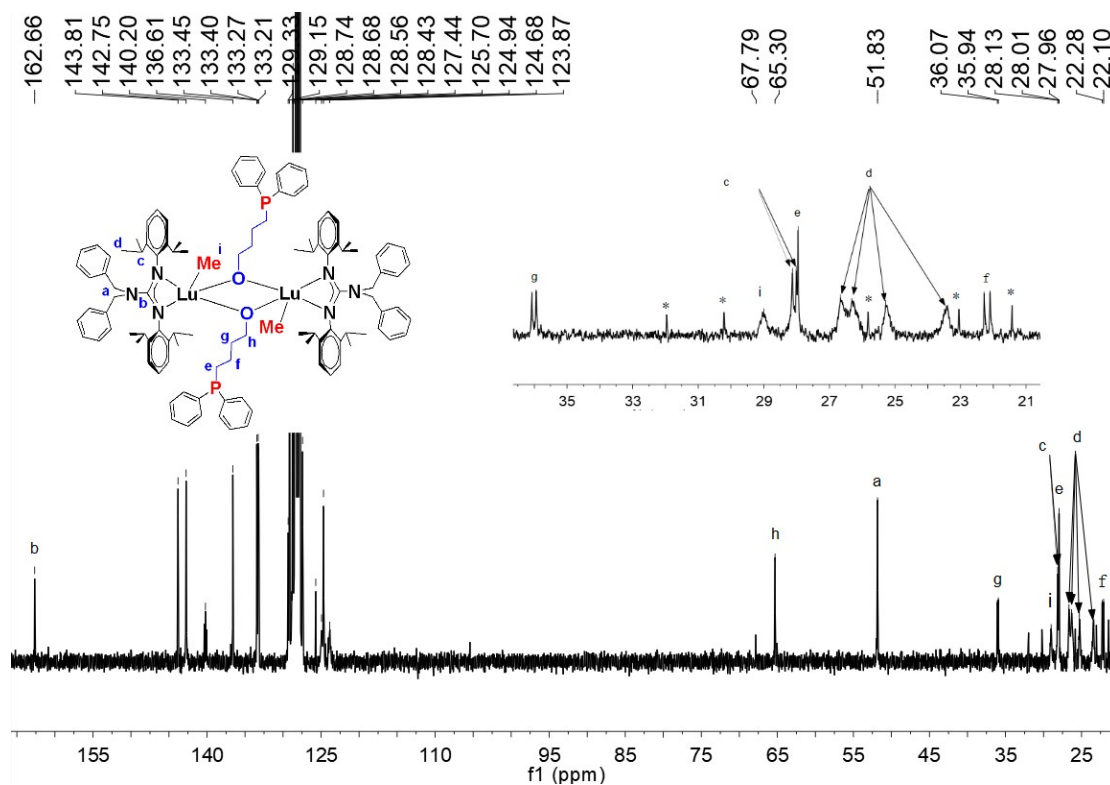

Fig. S11 <sup>13</sup>C NMR spectrum of **5** obtained in C<sub>6</sub>D<sub>6</sub> at room temperature.

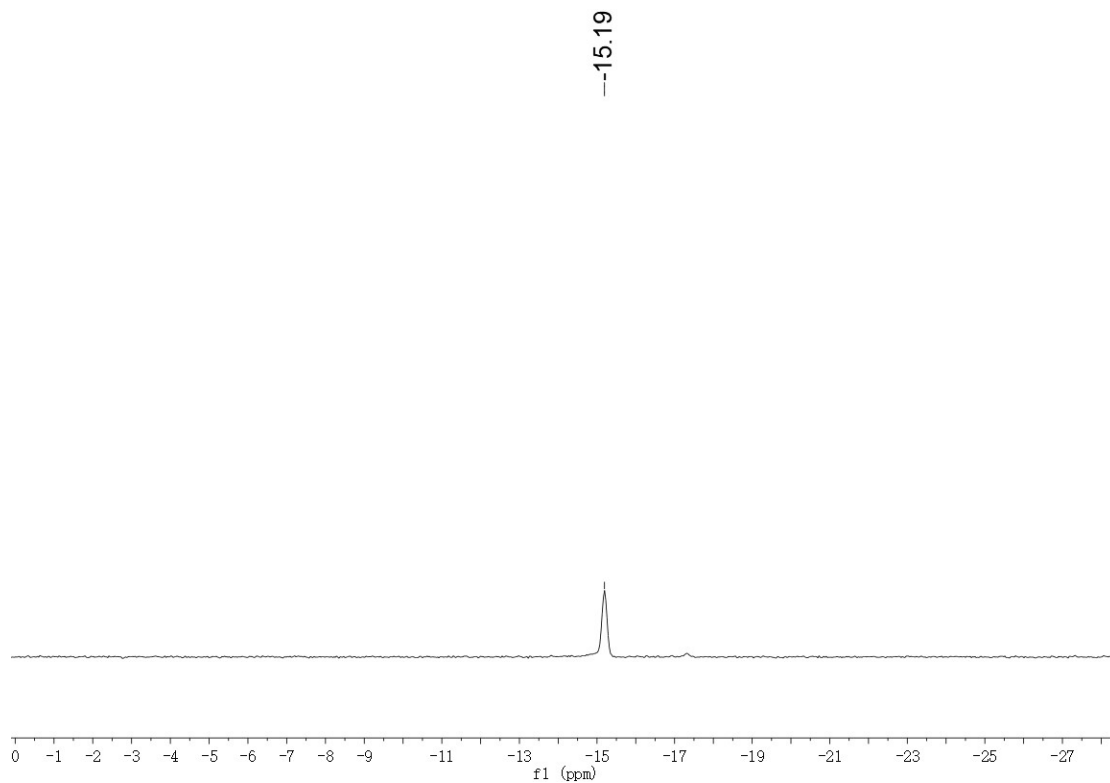

**Fig. S12**  $^{31}\text{P}$  NMR spectrum of **5** obtained in  $\text{C}_6\text{D}_6$  at room temperature.

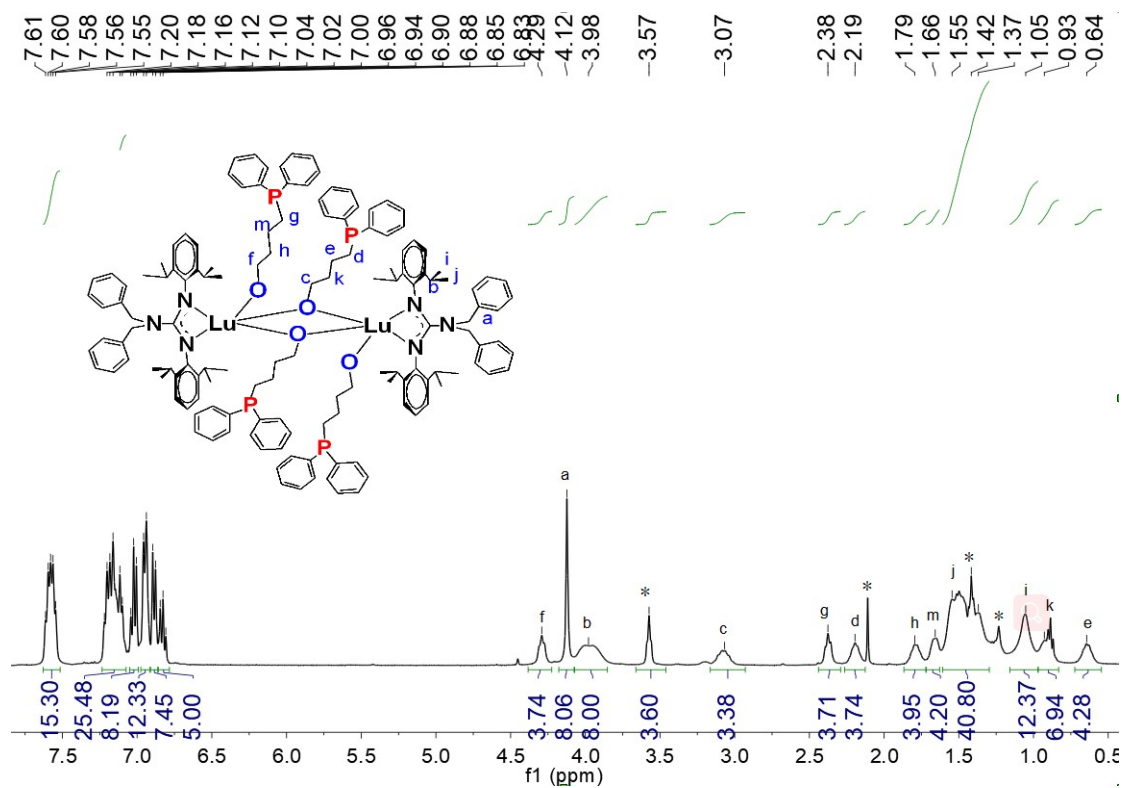

**Fig. S13**  $^1\text{H}$  NMR spectrum of **6** obtained in  $\text{C}_6\text{D}_6$  at room temperature.



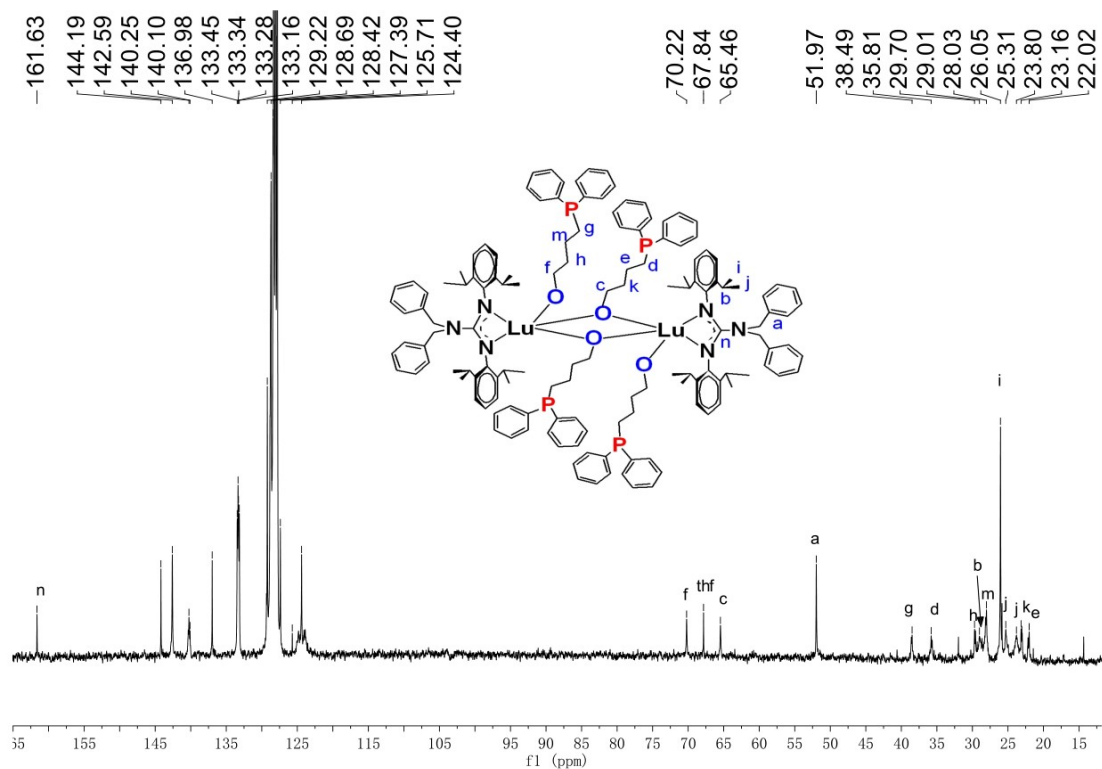

Fig. S14  $^{13}\text{C}$  NMR spectrum of **6** obtained in  $\text{C}_6\text{D}_6$  at room temperature.

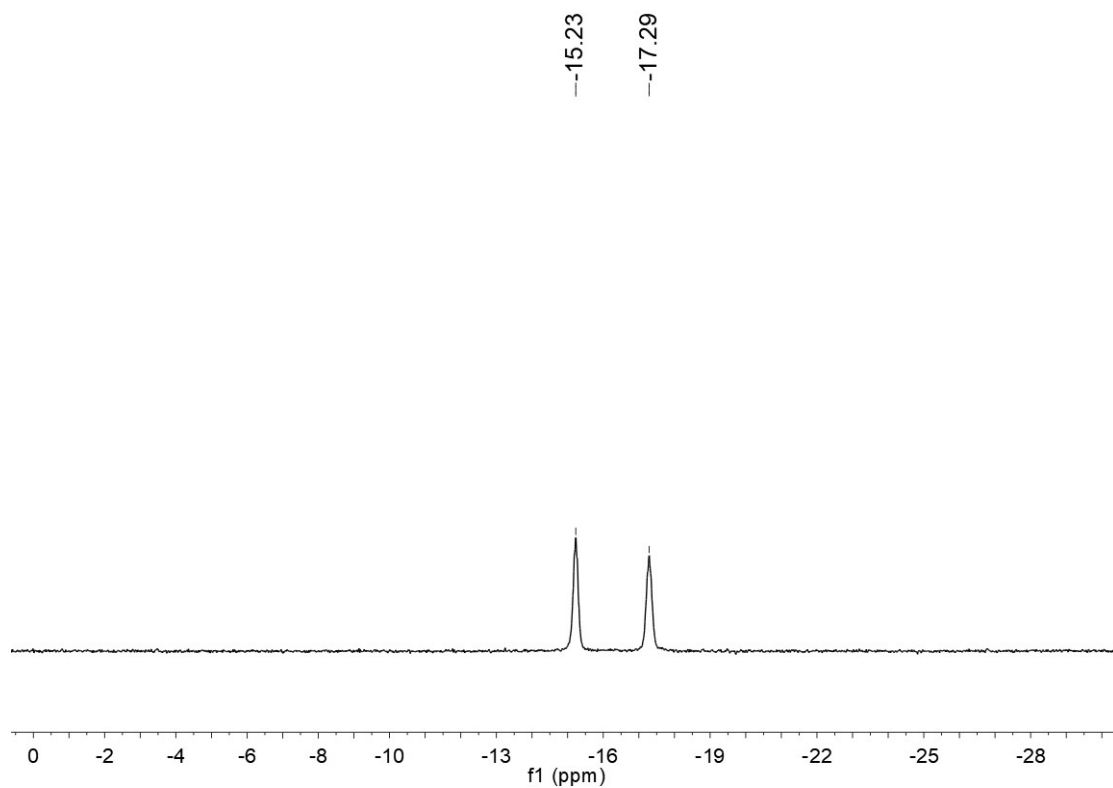

Fig. S15  $^{31}\text{P}$  NMR spectrum of **6** obtained in  $\text{C}_6\text{D}_6$  at room temperature.

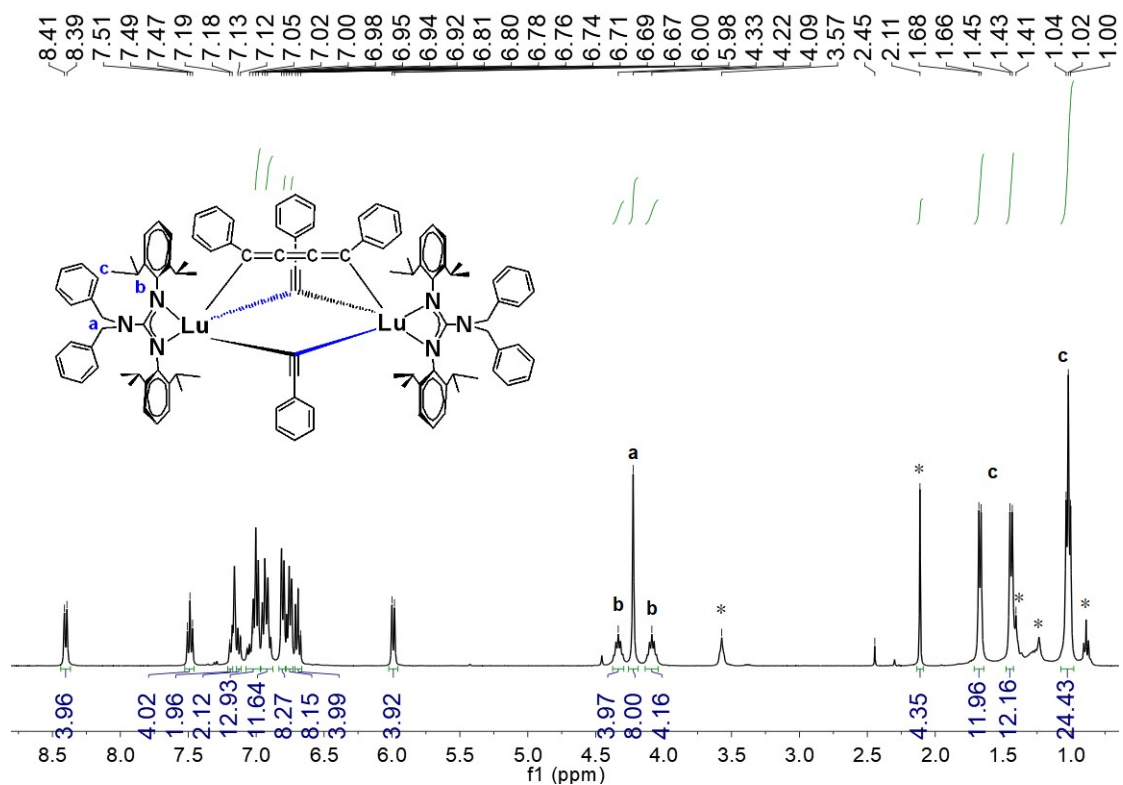

Fig. S16 <sup>1</sup>H NMR spectrum of **8** obtained in C<sub>6</sub>D<sub>6</sub> at room temperature.

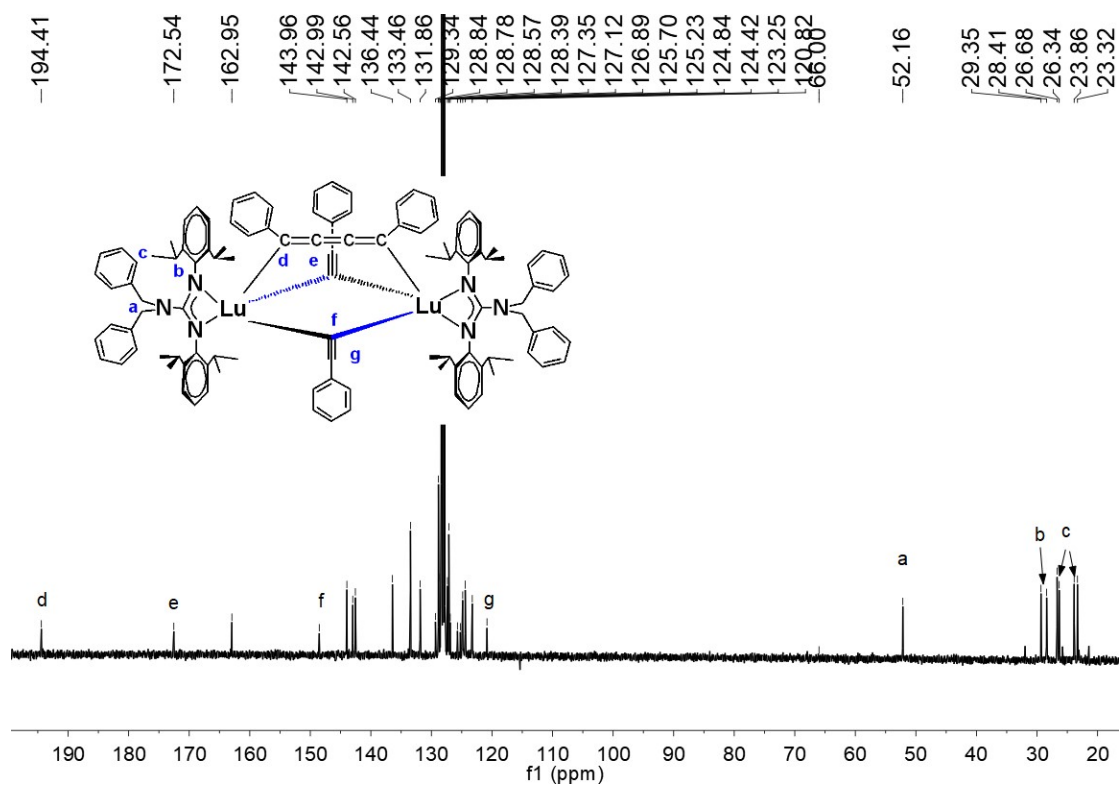

Fig. S17 <sup>13</sup>C NMR spectrum of **8** obtained in C<sub>6</sub>D<sub>6</sub> at room temperature.

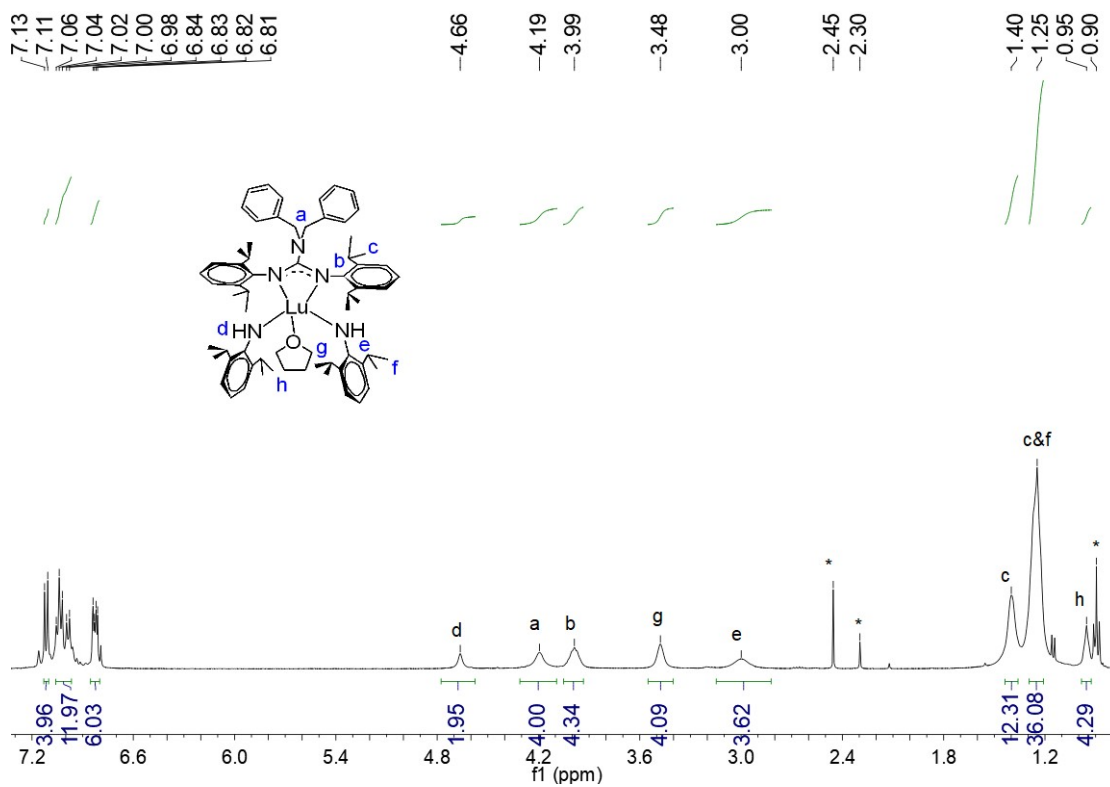

Fig. S18  $^1\text{H}$  NMR spectrum of **9** obtained in  $\text{C}_6\text{D}_6$  at room temperature.

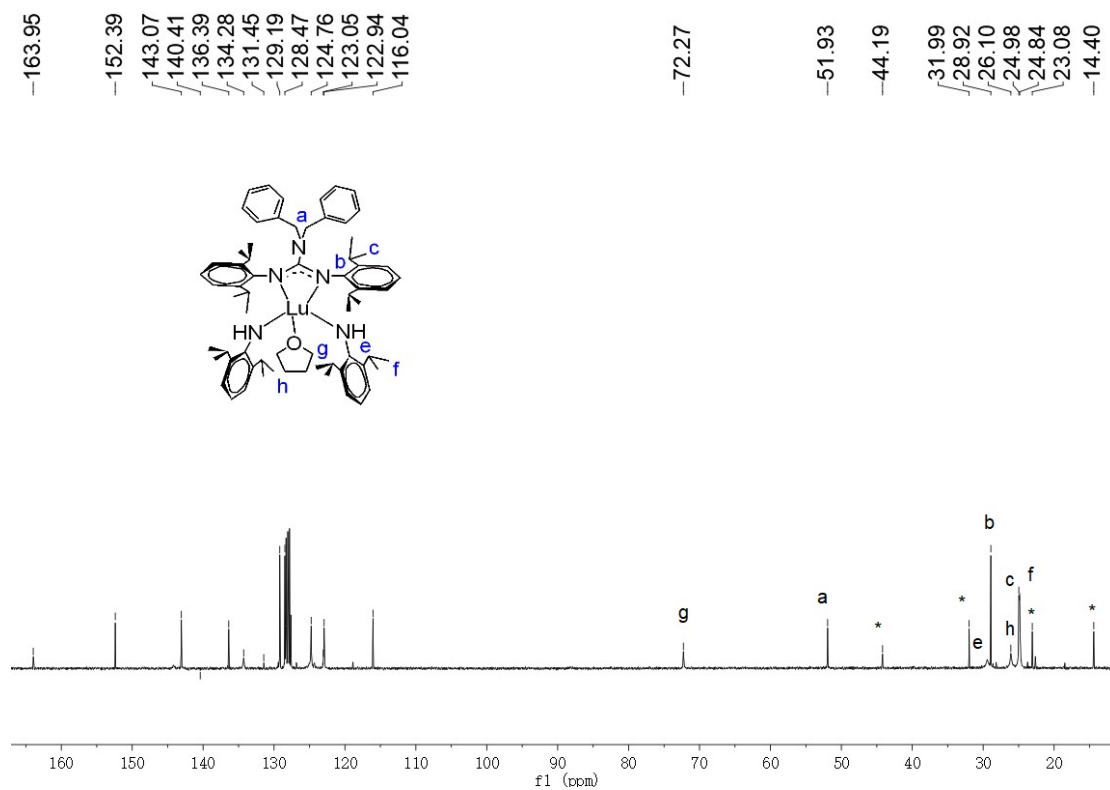

Fig. S19  $^{13}\text{C}$  NMR spectrum of **9** obtained in  $\text{C}_6\text{D}_6$  at room temperature.

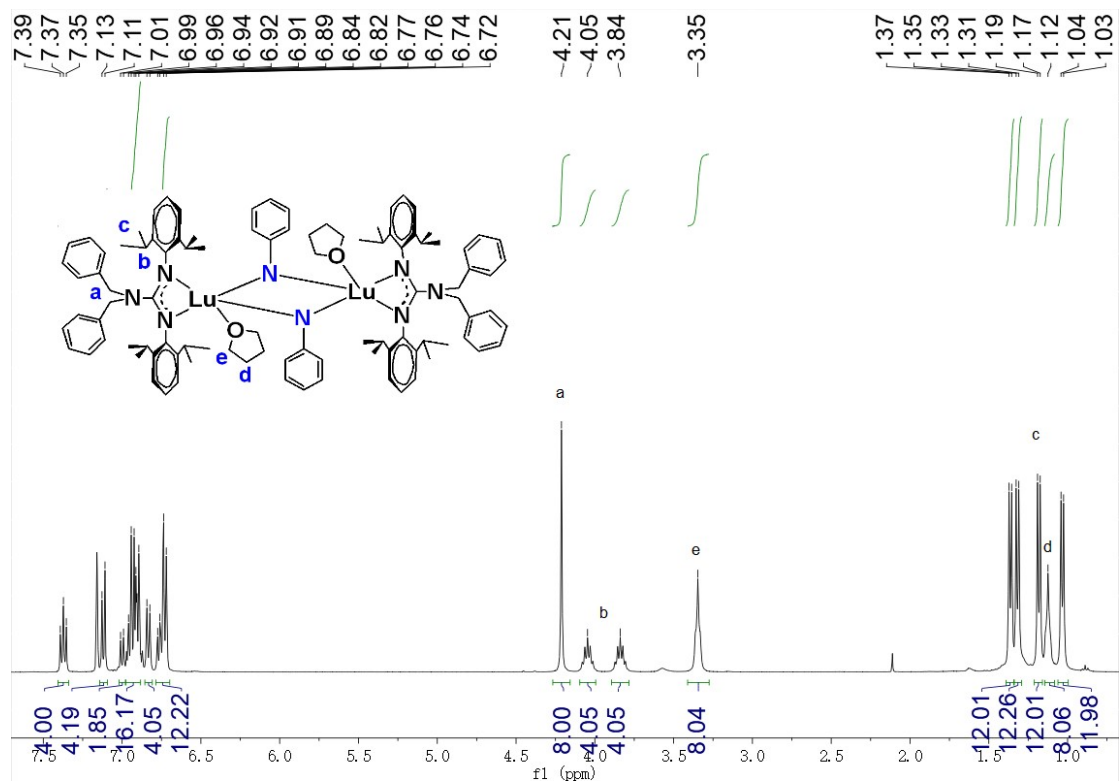

Fig. S20 <sup>1</sup>H NMR spectrum of **10** obtained in C<sub>6</sub>D<sub>6</sub> at room temperature.

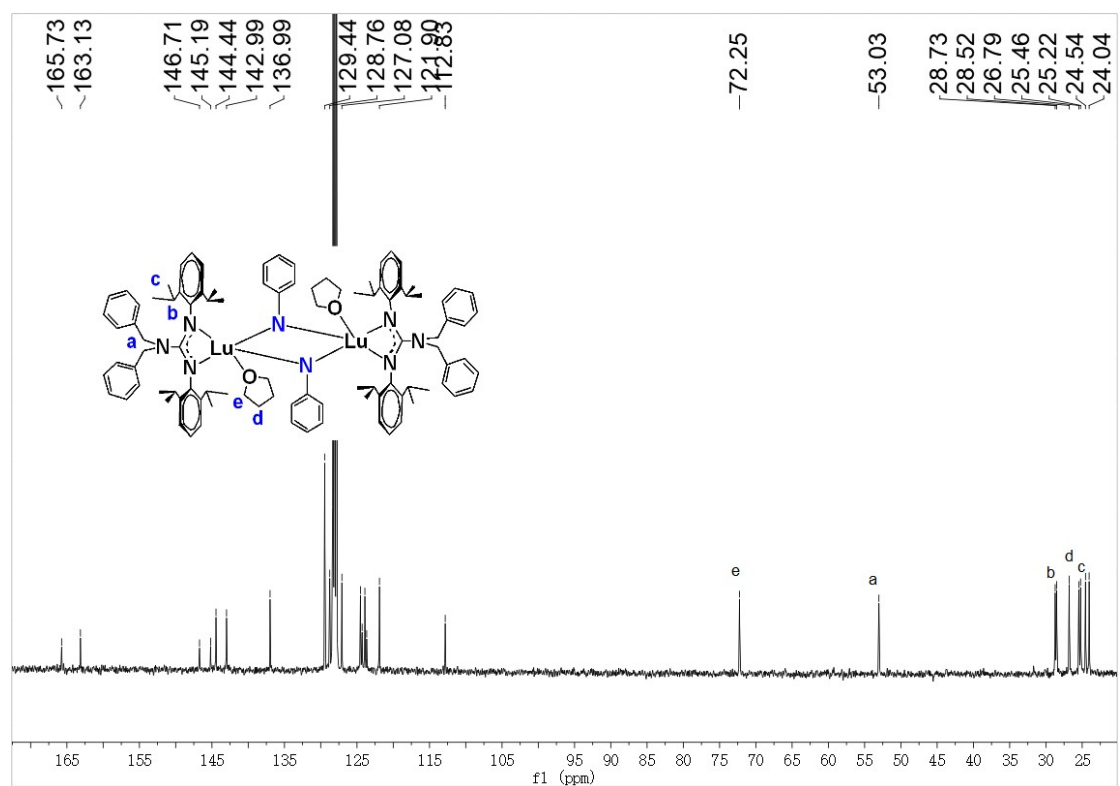

Fig. S21 <sup>13</sup>C NMR spectrum of **10** obtained in C<sub>6</sub>D<sub>6</sub> at room temperature.

## 2. X-ray Crystallographic Analysis of Complexes 1-8 and 10

X-ray crystallographic data collections were performed on a Bruker SMART APEX or Bruker SMART APEX II (at 173 K) diffractometer with CCD area detector using graphite-monochromated Mo-K $\alpha$  radiation ( $\lambda = 0.71073 \text{ \AA}$ ) or Ga-K $\alpha$  radiation ( $\lambda = 1.34138 \text{ \AA}$ ). The structure was solved by using SHELXTL program. Refinement was performed on  $F^2$  anisotropically by the full-matrix least-squares method for all the non-hydrogen atoms. Crystallographic data for structural analysis have been deposited with the Cambridge Crystallographic Data Centre. CCDC 2133403 (for **1**), 2133397 (for **2**), 2133400 (for **3**), 2133398 (for **4**), 2133395 (for **5**), 2133396 (for **6**), 2133399 (for **7**), 2133402 (for **8**), and 2133401 (for **10**), contain the supplementary crystallographic data for this paper.

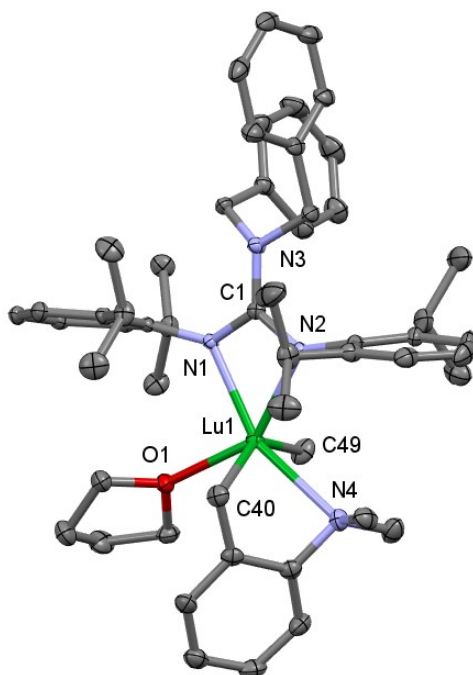

**Fig. S20** Molecular structure of complex **1** with thermal ellipsoids at 30% probability. All of the hydrogen atoms are omitted in complex **1**. Selected bond distances( $\text{\AA}$ ) and angles( $^\circ$ ): Lu(1)–N(1) 2.306(3), Lu(1)–N(2) 2.324(3), Lu(1)–O(1) 2.351(5), Lu(1)–C(49) 2.369(4), Lu(1)–C(40) 2.440(4) Lu(1)–N(4) 2.609(3); N(1)–Lu(1)–N(2) 57.19(10), N(1)–Lu(1)–O(1) 89.10(10), N(2)–Lu(1)–O(1) 145.75(10), N(1)–Lu(1)–C(49) 100.37(14).

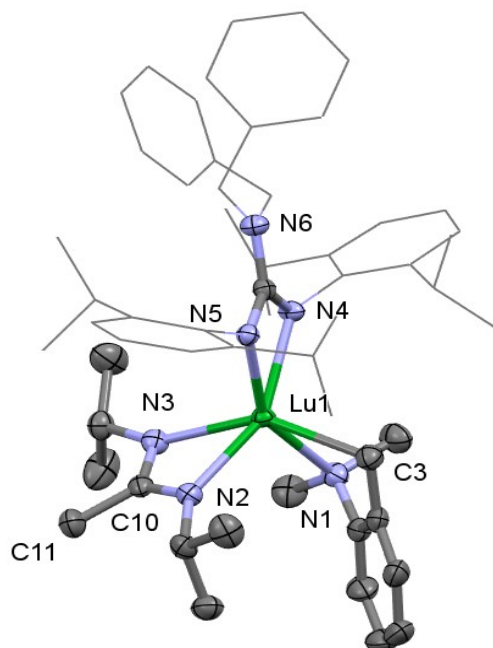

**Fig. S21** Molecular structures of **2** with thermal ellipsoids at 30% probability. Hydrogen atoms are omitted and selected carbon atoms are depicted as wireframe for clarity. Selected bond lengths (Å) and angles (deg): Lu(1)–N(1) 2.492(19), Lu(1)–N(2) 2.320(2), Lu(1)–N(3) 2.390(2), Lu(1)–N(4) 2.374(17), Lu(1)–N(5) 2.312(16), Lu(1)–C(3) 2.392(17), C(10)–C(11) 1.530(3), C(10)–N(2) 1.310(3), C(10)–N(3) 1.400(3); N(5)–Lu(1)–N(2) 105.7(7), N(5)–Lu(1)–N(3) 110.4(6), N(5)–Lu(1)–C(3) 98.0(6), N(5)–Lu(1)–N(1) 153.4(6), N(4)–Lu(1)–C(3) 103.5(6), N(4)–Lu(1)–N(3) 107.8(7), N(4)–Lu(1)–N(1) 102.8(6), N(2)–Lu(1)–N(4) 153.3(6), N(2)–Lu(1)–N(1) 99.2(7), N(2)–Lu(1)–C(3) 98.4(7), N(3)–Lu(1)–N(1) 91.0(7), C(3)–Lu(1)–N(3) 145.9(6).

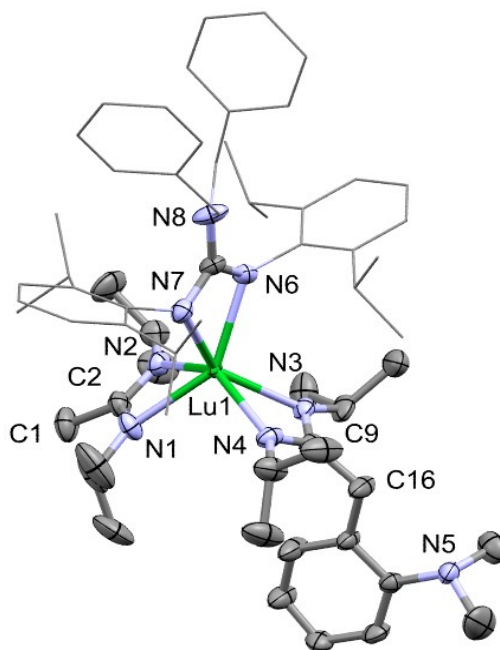

**Fig. S22** Molecular structures of **3** with thermal ellipsoids at 30% probability. Hydrogen atoms are omitted and selected carbon atoms are depicted as wireframe for clarity. Selected bond lengths (Å) and angles (deg): Lu(1)-N(3) 2.305(5), Lu(1)-N(2) 2.306(6), Lu(1)-N(4) 2.312(6), Lu(1)-N(1) 2.311(5), Lu(1)-N(6) 2.346(5), Lu(1)-N(7) 2.360(5), C(2)-N(1) 1.318(9), C(2)-N(2) 1.328(9), C(9)-N(3) 1.326(10), C(9)-N(4) 1.328(11), C(1)-C(2) 1.529(10), C(9)-C(16) 1.520(9); N(3)-Lu(1)-N(6) 100.6(2), N(2)-Lu(1)-N(6) 101.23(19), N(4)-Lu(1)-N(6) 116.51(19), N(1)-Lu(1)-N(6) 142.2(2), N(3)-Lu(1)-N(7) 139.48(19), N(2)-Lu(1)-N(7) 116.04(18), N(4)-Lu(1)-N(7) 99.9(2), N(1)-Lu(1)-N(7) 102.6(2), N(1)-C(2)-N(2) 113.5(6), N(3)-C(9)-N(4) 115.5(6).

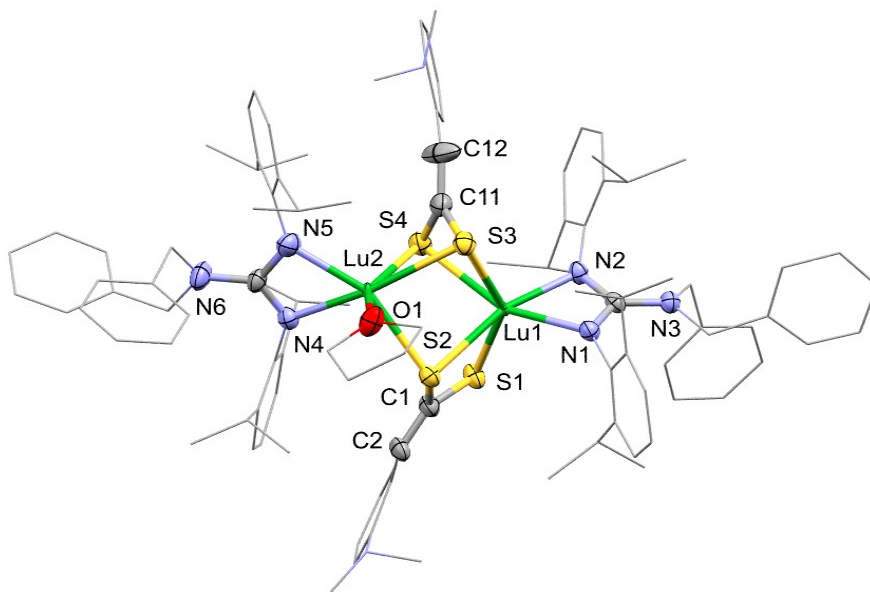

**Fig. S23** Molecular structures of **4** with thermal ellipsoids at 30% probability. Hydrogen atoms are omitted and selected carbon atoms are depicted as wireframe for clarity. Selected bond lengths (Å) and angles (deg): Lu(1)–S(1) 2.6033(17), Lu(1)–S(2) 2.7128(15), Lu(1)–S(4) 2.7356(18), Lu(1)–S(3) 2.7933(18), Lu(1)–Lu(2) 3.6076(5), Lu(2)–O(1) 2.3180(5), Lu(2)–S(2) 2.6988(17), Lu(2)–S(4) 2.7040(17), Lu(2)–S(3) 2.7607(17), C(1)–S(1) 1.7620(7), C(1)–S(2) 1.7980(7), C(1)–C(2) 1.3430(9), C(11)–C(12) 1.3440(12); S(1)–Lu(1)–S(2) 68.26(5), O(1)–Lu(2)–S(2) 79.14(14), N(2)–Lu(1)–S(1) 101.72(14), N(1)–Lu(1)–S(1) 106.24(14).



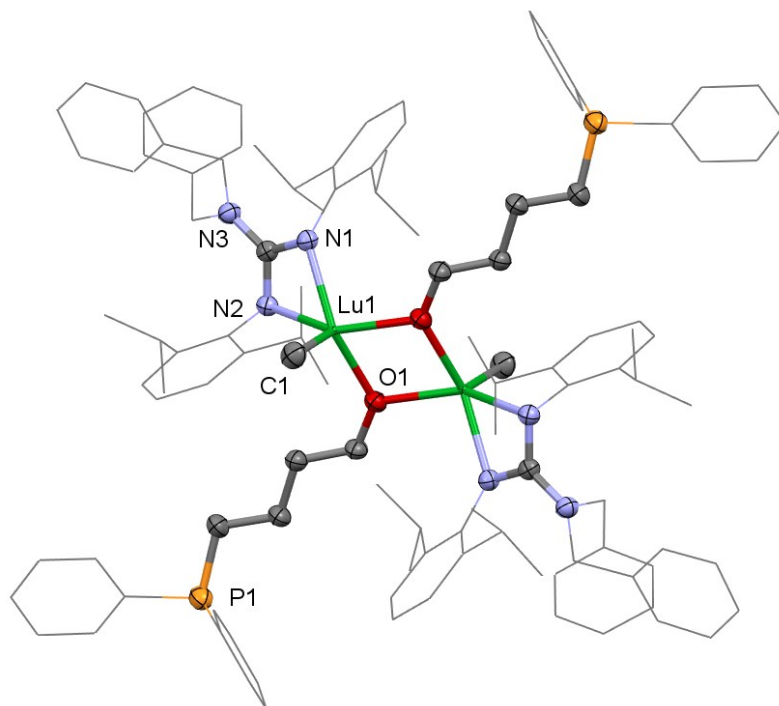

**Fig. S24** Molecular structures of **5** with thermal ellipsoids at 30% probability. Hydrogen atoms are omitted and selected carbon atoms are depicted as wireframe for clarity. Selected bond lengths (Å) and angles (deg): Lu(1)–O(1) 2.193(5), Lu(1)–N(1) 2.293(6), Lu(1)–C(1) 2.311(9), Lu(1)–N(2) 2.321(6), C(2)–O(1) 1.419(8), C(5)–P(1) 1.825(9); O(1)–Lu(1)–C(1) 109.6(3), N(1)–Lu(1)–C(1) 105.7(3), C(1)–Lu(1)–N(2) 112.0(3),

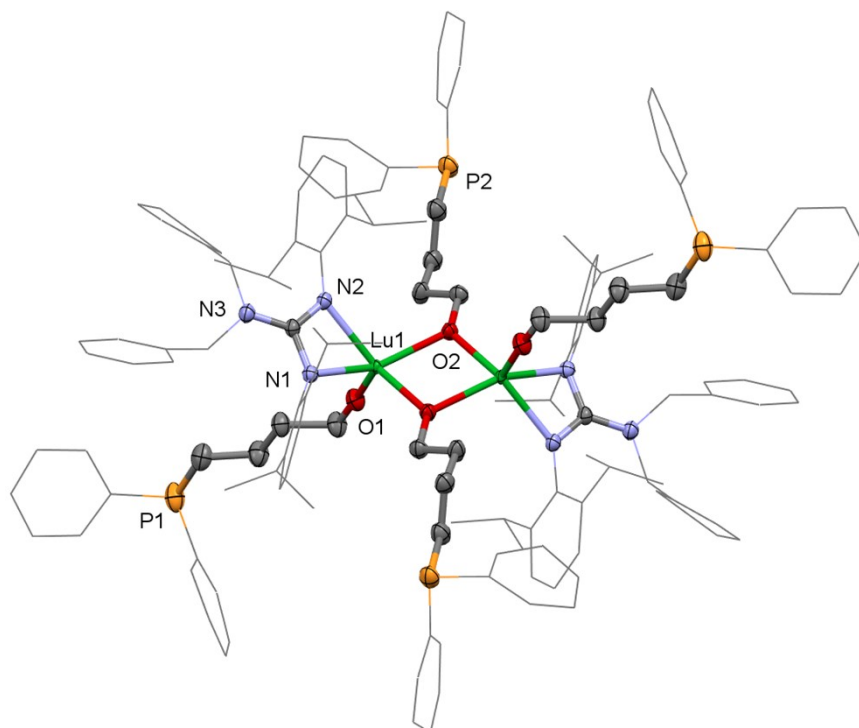

**Fig. S25** Molecular structures of **6** with thermal ellipsoids at 30% probability. Hydrogen atoms are omitted and selected carbon atoms are depicted as wireframe for clarity. Selected bond lengths (Å) and angles (deg): Lu(1)–O(1) 2.022(6), Lu(1)–O(2) 2.203(4), Lu(1)–N(2) 2.287(6), Lu(1)–N(1) 2.335(6), C(4)–P(1) 1.812(14), C(20)–P(2) 1.884(12); O(1)–Lu(1)–O(2) 112.6(2), O(1)–Lu(1)–N(2) 105.4(2), O(2)–Lu(1)–N(2) 97.08(18), O(1)–Lu(1)–N(1) 110.1(2), O(2)–Lu(1)–N(1) 134.9(2),

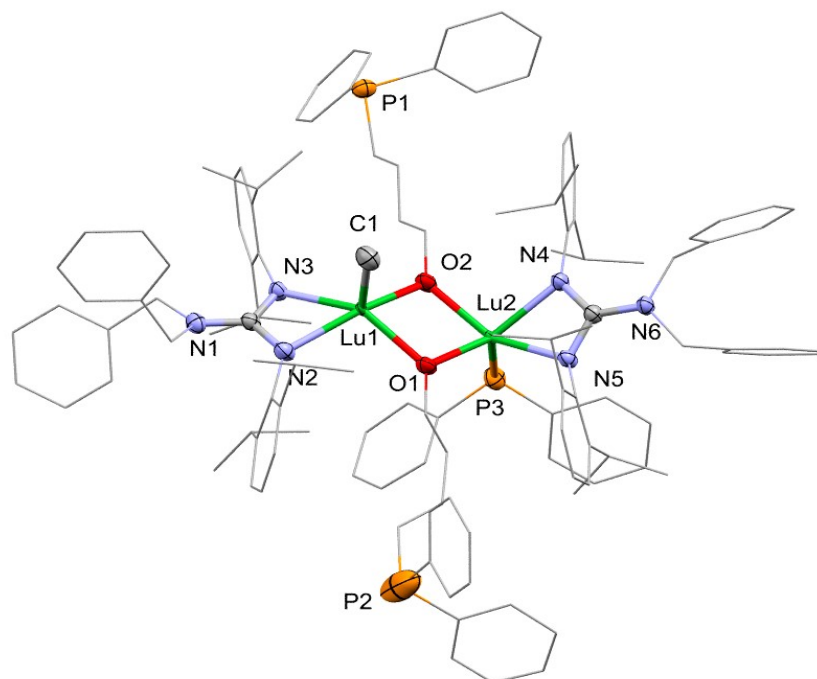

**Fig. S26** Molecular structures of **7** with thermal ellipsoids at 30% probability. Hydrogen atoms are omitted and selected carbon atoms are depicted as wireframe for clarity. Selected bond lengths (Å) and angles (deg): Lu(1)–O(1) 2.206(5), Lu(1)–O(2) 2.226(5), Lu(2)–O(2) 2.181(5), Lu(2)–O(1) 2.190(4), Lu(1)–Lu(2) 3.532(5), Lu(1)–C(1) 2.325(8), Lu(2)–P(3) 2.755(19), O(1)–Lu(1)–C(1) 111.3(2), O(2)–Lu(1)–C(1) 105.1(2), N(2)–Lu(1)–C(1) 97.7(2), N(3)–Lu(1)–C(1) 104.8(2), C(1)–Lu(1)–Lu(2) 111.2(2), O(2)–Lu(2)–P(3) 104.96(14), O(1)–Lu(2)–P(3) 114.98(13), N(5)–Lu(2)–P(3) 109.20(13), N(4)–Lu(2)–P(3) 112.48(14), P(3)–Lu(2)–Lu(1) 116.88(4).

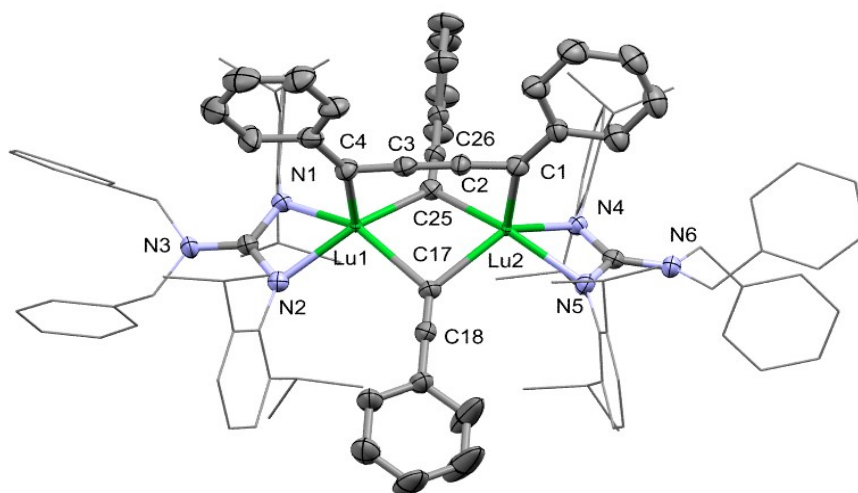

**Fig. S27** Molecular structures of **8** with thermal ellipsoids at 30% probability. Hydrogen atoms are omitted and selected carbon atoms are depicted as wireframe for clarity. Selected bond lengths (Å) and angles (deg): Lu(1)–Lu(2) 3.4506(5), Lu(1)–C(4) 2.325(6), Lu(2)–C(1) 2.305(6), Lu(2)–C(2) 2.640(6), Lu(1)–C(3) 2.635(7), Lu(1)–C(25) 2.398(7), Lu(1)–C(17) 2.436(6), Lu(2)–C(17) 2.420(7), Lu(2)–C(25) 2.428(7), C(1)–C(2) 1.313(9), C(2)–C(3) 1.282(9), C(3)–C(4) 1.342(9), C(17)–C(18) 1.224(9), C(25)–C(26) 1.242(9); C(4)–Lu(1)–C(25) 107.8(2), C(4)–Lu(1)–C(17) 104.2(2), C(1)–Lu(2)–C(17) 108.4(2), C(1)–Lu(2)–C(25) 102.2(2), N(1)–Lu(1)–C(4) 105.3(2), N(2)–Lu(1)–C(4) 115.6(2), N(5)–Lu(2)–C(1) 108.0(2), N(4)–Lu(2)–C(1) 113.1(2), C(3)–C(2)–C(1) 174.8(7), C(2)–C(3)–C(4) 176.0(7), C(25)–Lu(1)–C(17) 84.7(2), Lu(2)–C(17)–Lu(1) 90.6(2).

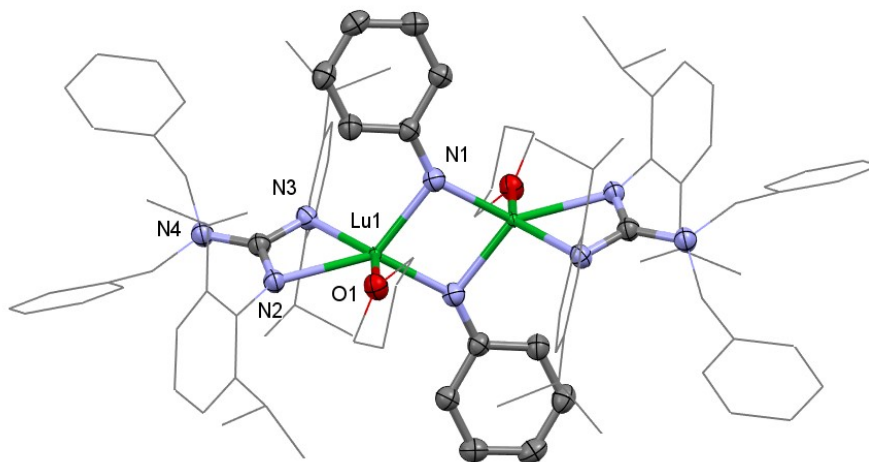

**Fig. S28** Molecular structures of **9** with thermal ellipsoids at 30% probability. Hydrogen atoms are omitted and selected carbon atoms are depicted as wireframe for clarity. Selected bond lengths (Å) and angles (deg): Lu(1)–N(1) 2.210(3), Lu(1)–N(2) 2.358(2), Lu(1)–N(3) 2.339(2), Lu(1)–O(1) 2.339(1); N(2)–Lu(1)–O(1) 85.97(13), N(1)–Lu(1)–O(1) 84.04(13), N(2)–Lu(1)–N(1) 157.45(16), N(1)–Lu(1)–N(3) 100.71(13), N(1)–Lu(1)–N(4) 99.27(13), N(2)–Lu(1)–N(3) 98.50(13), N(2)–Lu(1)–N(4) 100.99(13).

**Table 1. Crystal and Data Collection Parameters of Complexes 1, 2 and 3**

|                                                   | <b>1</b>                                           | <b>2</b>                                          | <b>3</b>                                          |
|---------------------------------------------------|----------------------------------------------------|---------------------------------------------------|---------------------------------------------------|
| Formula                                           | C <sub>53</sub> H <sub>71</sub> N <sub>4</sub> LuO | C <sub>56</sub> H <sub>77</sub> N <sub>5</sub> Lu | C <sub>63</sub> H <sub>91</sub> N <sub>8</sub> Lu |
| Formula weight                                    | 955.10                                             | 995.23                                            | 1135.40                                           |
| Temperature (K)                                   | 173(2)                                             | 298(2)                                            | 203(2)                                            |
| Wavelength (Å)                                    | 0.71073                                            | 0.71073                                           | 1.34138                                           |
| Crystal system                                    | Triclinic                                          | Triclinic                                         | Monoclinic                                        |
| Space group                                       | P-1                                                | P1                                                | C2/c                                              |
| a(Å)                                              | 10.8584(6)                                         | 10.2506(14)                                       | 18.5416(9)                                        |
| b(Å)                                              | 11.5196(6)                                         | 12.2916(17)                                       | 18.5847(9)                                        |
| c(Å)                                              | 21.0813(12)                                        | 22.231(3)                                         | 36.1653(18)                                       |
| α (deg)                                           | 82.416(2)                                          | 80.511(2)                                         | 90                                                |
| β (deg)                                           | 84.118(2)                                          | 77.101(2)                                         | 104.630(2)                                        |
| γ (deg)                                           | 65.697(2)                                          | 69.932(2)                                         | 90                                                |
| V (Å <sup>3</sup> )                               | 2378.9(2)                                          | 2552.6(6)                                         | 12058.1(10)                                       |
| Z                                                 | 2                                                  | 2                                                 | 8                                                 |
| Dc (g/m <sup>3</sup> )                            | 1.333                                              | 1.313                                             | 1.251                                             |
| μ (mm <sup>-1</sup> )                             | 2.116                                              | 1.975                                             | 2.274                                             |
| F(000)                                            | 992                                                | 1052                                              | 4768                                              |
| Crystal size (mm)                                 | 0.50 x 0.25 x 0.04                                 | 0.420 x 0.400 x 0.200                             | 0.110 x 0.090 x 0.080                             |
| θ range (°)                                       | 1.952 to 27.000                                    | 1.888 to 27.675                                   | 2.978 to 56.994                                   |
|                                                   | -13<=h<=13                                         | -9<=h<=13                                         | -23<=h<=23                                        |
| h, k, l range                                     | -14<=k<=14                                         | -15<=k<=16                                        | -23<=k<=22                                        |
|                                                   | -26<=l<=26                                         | -29<=l<=28                                        | -45<=l<=45                                        |
| Reflections collected / unique                    | 107198/10376<br>[R(int) = 0.1253]                  | 18786/11583<br>[R(int) = 0.0213]                  | 74964/12333<br>[R(int) = 0.0638]                  |
| Completeness to θ                                 | 99.9 %                                             | 97.7 %                                            | 99.8 %                                            |
| Refinement method                                 | Full-matrix<br>least-squares on F <sup>2</sup>     | Full-matrix<br>least-squares on F <sup>2</sup>    | Full-matrix<br>least-squares on F <sup>2</sup>    |
| Data / restraints / parameters                    | 10376 / 18 / 577                                   | 11583 / 0 / 582                                   | 12333 / 341 / 821                                 |
| Goodness-of-fit on F <sup>2</sup>                 | 1.030                                              | 1.072                                             | 1.025                                             |
| Final R indices [I>2σ(I)]                         | R1 = 0.0379<br>wR2 = 0.0790                        | R1 = 0.0241<br>wR2 = 0.0614                       | R1 = 0.0550<br>wR2 = 0.1629                       |
| R indices (all data)                              | R1 = 0.0549<br>wR2 = 0.0860                        | R1 = 0.0285<br>wR2 = 0.0636                       | R1 = 0.0673<br>wR2 = 0.1733                       |
| Largest diff. peak and hole (e. Å <sup>-3</sup> ) | 1.110 and -1.660                                   | 0.702 and -0.370                                  | 1.181 and -0.424                                  |

**Table 2. Crystal and Data Collection Parameters of Complexes 4, 5 and 6**

|                                                   | <b>4</b>                                                                          | <b>5</b>                                                                                       | <b>6</b>                                                                                       |
|---------------------------------------------------|-----------------------------------------------------------------------------------|------------------------------------------------------------------------------------------------|------------------------------------------------------------------------------------------------|
| Formula                                           | C <sub>102</sub> H <sub>118</sub> Lu <sub>2</sub> N <sub>8</sub> S <sub>4</sub> O | C <sub>112</sub> H <sub>138</sub> Lu <sub>2</sub> O <sub>2</sub> N <sub>6</sub> P <sub>2</sub> | C <sub>142</sub> H <sub>168</sub> Lu <sub>2</sub> O <sub>4</sub> N <sub>6</sub> P <sub>4</sub> |
| Formula weight                                    | 1950.31                                                                           | 2012.25                                                                                        | 2496.52                                                                                        |
| Temperature (K)                                   | 173(2)                                                                            | 173(2)                                                                                         | 173(2)                                                                                         |
| Wavelength (Å)                                    | 1.34138 Å                                                                         | 1.34138                                                                                        | 1.34138                                                                                        |
| Crystal system                                    | Monoclinic                                                                        | Triclinic                                                                                      | Triclinic                                                                                      |
| Space group                                       | P2 <sub>1</sub> /c                                                                | P-1                                                                                            | P-1                                                                                            |
| a(Å)                                              | 22.8411(6)                                                                        | 11.4744(5)                                                                                     | 14.5232(14)                                                                                    |
| b(Å)                                              | 16.4502(4)                                                                        | 15.9967(7) Å                                                                                   | 15.3348(15)                                                                                    |
| c(Å)                                              | 30.0192(7)                                                                        | 16.4196(7) Å                                                                                   | 15.5621(15)                                                                                    |
| α (deg)                                           | 90                                                                                | 99.226(2)                                                                                      | 85.697(4)                                                                                      |
| β (deg)                                           | 95.0260(10)                                                                       | 102.621(2)                                                                                     | 70.525(4)                                                                                      |
| γ (deg)                                           | 90                                                                                | 100.950(2)                                                                                     | 77.353(4)                                                                                      |
| V (Å <sup>3</sup> )                               | 11236.1(5)                                                                        | 2822.7(2)                                                                                      | 3188.3(5)                                                                                      |
| Z                                                 | 4                                                                                 | 1                                                                                              | 1                                                                                              |
| D <sub>c</sub> (g/m <sup>3</sup> )                | 1.158                                                                             | 1.269                                                                                          | 1.300                                                                                          |
| μ (mm <sup>-1</sup> )                             | 2.835                                                                             | 2.585                                                                                          | 2.534                                                                                          |
| F(000)                                            | 4032                                                                              | 1120                                                                                           | 1296                                                                                           |
| Crystal size (mm)                                 | 0.320 x 0.230 x 0.220                                                             | 0.100 x 0.100 x 0.080                                                                          | 0.090 x 0.070 x 0.040                                                                          |
| θ range (°)                                       | 2.950 to 57.074                                                                   | 3.859 to 55.029                                                                                | 6.388 to 114.994                                                                               |
|                                                   | -28<=h<=28                                                                        | -13<=h<=14                                                                                     | -18<=h<=17                                                                                     |
| h, k, l range                                     | -20<=k<=20                                                                        | -19<=k<=19                                                                                     | -19<=k<=19                                                                                     |
|                                                   | -37<=l<=29                                                                        | -20<=k<=19                                                                                     | -19<=k<=19                                                                                     |
| Reflections collected / unique                    | 135456/22991                                                                      | 31302/10365                                                                                    | 48926/13112                                                                                    |
|                                                   | [R(int) = 0.0476                                                                  | [R(int) = 0.0718]                                                                              | [R(int) = 0.0916]                                                                              |
| Completeness to θ                                 | 99.8 %                                                                            | 96.5 %                                                                                         | 99.9 %                                                                                         |
| Refinement method                                 | Full-matrix                                                                       | Full-matrix                                                                                    | Full-matrix                                                                                    |
|                                                   | least-squares on F <sup>2</sup>                                                   | least-squares on F <sup>2</sup>                                                                | least-squares on F <sup>2</sup>                                                                |
| Data / restraints / parameters                    | 22995 / 484 / 1298                                                                | 10365 / 12 / 568                                                                               | 13112 / 408 / 727                                                                              |
| Goodness-of-fit on F <sup>2</sup>                 | 1.072                                                                             | 1.070                                                                                          | 1.125                                                                                          |
| Final R indices                                   | R1 = 0.0520                                                                       | R1 = 0.0838                                                                                    | R1 = 0.1008                                                                                    |
| [I>2σ(I)]                                         | wR2 = 0.1564                                                                      | wR2 = 0.2340                                                                                   | wR2 = 0.2775                                                                                   |
| R indices (all data)                              | R1 = 0.0599                                                                       | R1 = 0.0927                                                                                    | R1 = 0.1190                                                                                    |
|                                                   | wR2 = 0.1607                                                                      | wR2 = 0.2410                                                                                   | wR2 = 0.2923                                                                                   |
| Largest diff. peak and hole (e. Å <sup>-3</sup> ) | 0.879 and -0.718                                                                  | 1.649 and -1.155                                                                               | 2.51 and -1.12                                                                                 |

**Table 3. Crystal and Data Collection Parameters of Complexes 7, 8 and 9**

|                                                   | <b>7</b>                                                                                       | <b>8</b>                                                         | <b>9</b>                                                                       |
|---------------------------------------------------|------------------------------------------------------------------------------------------------|------------------------------------------------------------------|--------------------------------------------------------------------------------|
| Formula                                           | C <sub>123</sub> H <sub>145</sub> Lu <sub>2</sub> O <sub>2</sub> N <sub>6</sub> P <sub>3</sub> | C <sub>110</sub> H <sub>116</sub> N <sub>6</sub> Lu <sub>2</sub> | C <sub>98</sub> H <sub>122</sub> Lu <sub>2</sub> N <sub>8</sub> O <sub>2</sub> |
| Formula weight                                    | 2182.29                                                                                        | 1872.02                                                          | 1793.96                                                                        |
| Temperature (K)                                   | 173(2)                                                                                         | 173(2)                                                           | 173(2)                                                                         |
| Wavelength (Å)                                    | 1.34138                                                                                        | 1.34138                                                          | 1.34138                                                                        |
| Crystal system                                    | Triclinic                                                                                      | Monoclinic                                                       | Triclinic                                                                      |
| Space group                                       | P-1                                                                                            | P2 <sub>1</sub> /c                                               | P-1                                                                            |
| a(Å)                                              | 16.9768(7)                                                                                     | 34.1224(14)                                                      | 11.7160(6)                                                                     |
| b(Å)                                              | 18.2805(7)                                                                                     | 12.8198(5)                                                       | 12.8939(8)                                                                     |
| c(Å)                                              | 20.4588(8)                                                                                     | 23.4595(10)                                                      | 17.0465(10)                                                                    |
| α (deg)                                           | 96.866(2)                                                                                      | 90                                                               | 95.663(2)                                                                      |
| β (deg)                                           | 92.540(2)                                                                                      | 108.391(2)                                                       | 107.984(2)                                                                     |
| γ (deg)                                           | 117.586(2)                                                                                     | 90                                                               | 113.851(2)                                                                     |
| V (Å <sup>3</sup> )                               | 5551.1(4)                                                                                      | 9738.0(7)                                                        | 2164.9(2)                                                                      |
| Z                                                 | 2                                                                                              | 4                                                                | 4                                                                              |
| D <sub>c</sub> (g/m <sup>3</sup> )                | 1.306                                                                                          | 1.270                                                            | 1.376                                                                          |
| μ (mm <sup>-1</sup> )                             | 2.713                                                                                          | 2.729                                                            | 3.068                                                                          |
| F(000)                                            | 2256                                                                                           | 3815                                                             | 924                                                                            |
| Crystal size (mm)                                 | 0.300 x 0.200 x 0.100                                                                          | 0.050 x 0.050 x 0.040                                            | 0.160 x 0.110 x 0.080                                                          |
| θ range (°)                                       | 3.137 to 54.904                                                                                | 3.279 to 55.254                                                  | 3.716 to 57.129                                                                |
|                                                   | -20<=h<=20                                                                                     | -41<=h<=41                                                       | -14<=h<=14                                                                     |
| h, k, l range                                     | -22<=k<=22                                                                                     | -15<=k<=15                                                       | -16<=k<=16                                                                     |
|                                                   | -24<=l<=23                                                                                     | -28<=l<=28                                                       | -21<=l<=21                                                                     |
| Reflections collected                             | 70607/20964                                                                                    | 114001/18621                                                     | 48291/8861                                                                     |
| / unique                                          | [R(int) = 0.0473]                                                                              | [R(int) = 0.1127]                                                | [R(int) = 0.0604]                                                              |
| Completeness to θ                                 | 99.5 %                                                                                         | 99.8 %                                                           | 99.9 %                                                                         |
| Refinement method                                 | Full-matrix                                                                                    | Full-matrix                                                      | Full-matrix                                                                    |
|                                                   | least-squares on F <sup>2</sup>                                                                | least-squares on F <sup>2</sup>                                  | least-squares on F <sup>2</sup>                                                |
| Data / restraints / parameters                    | 20964 / 400 / 1422                                                                             | 18621 / 572 / 1142                                               | 8861 / 12 / 505                                                                |
| Goodness-of-fit on F <sup>2</sup>                 | 1.067                                                                                          | 1.022                                                            | 1.120                                                                          |
| Final R indices [I>2σ(I)]                         | R1 = 0.0552                                                                                    | R1 = 0.0506                                                      | R1 = 0.0372                                                                    |
|                                                   | wR2 = 0.1483                                                                                   | wR2 = 0.1251                                                     | wR2 = 0.0992                                                                   |
| R indices (all data)                              | R1 = 0.0698                                                                                    | R1 = 0.0868                                                      | R1 = 0.0427                                                                    |
|                                                   | wR2 = 0.1566                                                                                   | wR2 = 0.1420                                                     | wR2 = 0.1017                                                                   |
| Largest diff. peak and hole (e. Å <sup>-3</sup> ) | 1.243 and -0.838                                                                               | 0.826 and -0.464                                                 | 0.740 and -0.308                                                               |
